# Supplementary material for: A further electrochemical investigation on solutions to high energetical power sources: isomerous compound 0.75Li1.2Ni0.2Mn0.6O2·0.25LiNi0.5Mn1.5O4
Source: Royal Society of Chemistry journal article supplement (doi:10.1039/c5ra03289j), 2015-01-01
Supplement: c5ra03289j1.pdf [file c5ra03289j1.pdf]

## Supporting Information

### **A Further Electrochemical Investigation on Solution to High Energetical Power Source: Isomeric Compound**

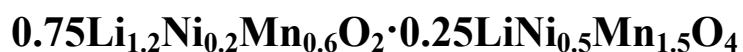

Zhuo Zheng,<sup>a</sup> Zhen-Guo Wu,<sup>a</sup> Yan-Jun Zhong,<sup>a</sup> Chong-Heng Shen,<sup>b</sup> Wei-Bo Hua,<sup>a</sup> Bin-Bin Xu,<sup>b</sup>  
Chong Yu,<sup>c</sup> Ben-He Zhong<sup>a</sup> and Xiao-Dong Guo<sup>\*a</sup>

<sup>a</sup> College of Chemical Engineering, Sichuan University, No.24 South Section 1, Yihuan Road,  
Chengdu, 610065, China.

<sup>b</sup> Department of Chemistry, College of Chemistry and Chemical Engineering, Xiamen University,  
Fujian 361005, China.

<sup>c</sup> National Key Laboratory for Nuclear Fuel and Materials, Nuclear Power Institute of China,  
Chengdu, 610041, China.

\*Corresponding author. Email: xiaodong2009@scu.edu.cn

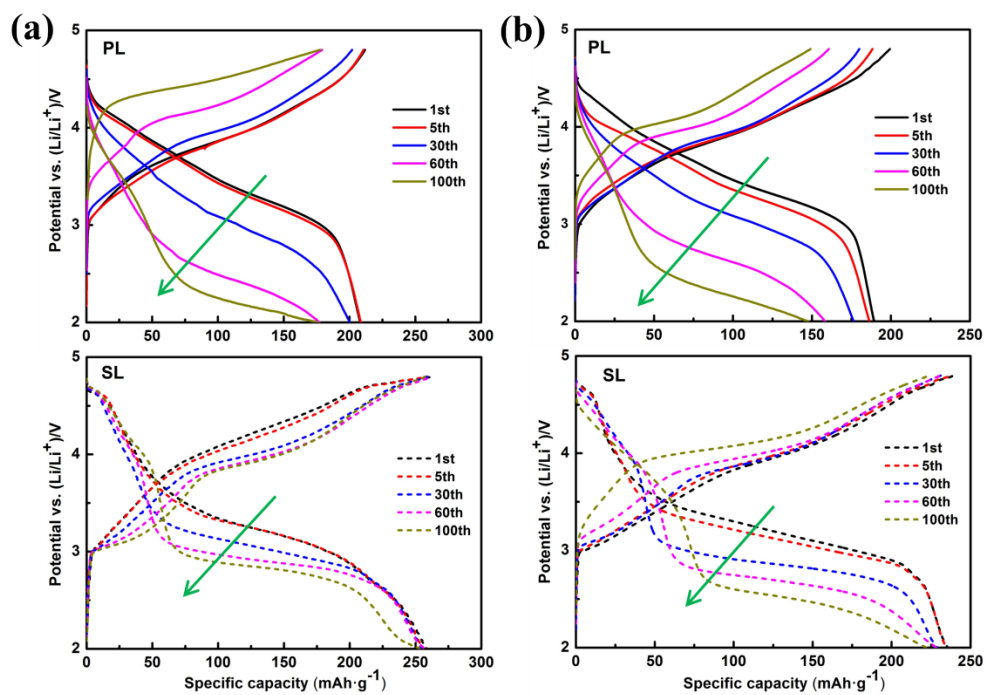

Fig. S1 Charge and discharge profiles of PL and SL samples upon the cycling (a) at 0.5 C rate, (b) at 1 C rate

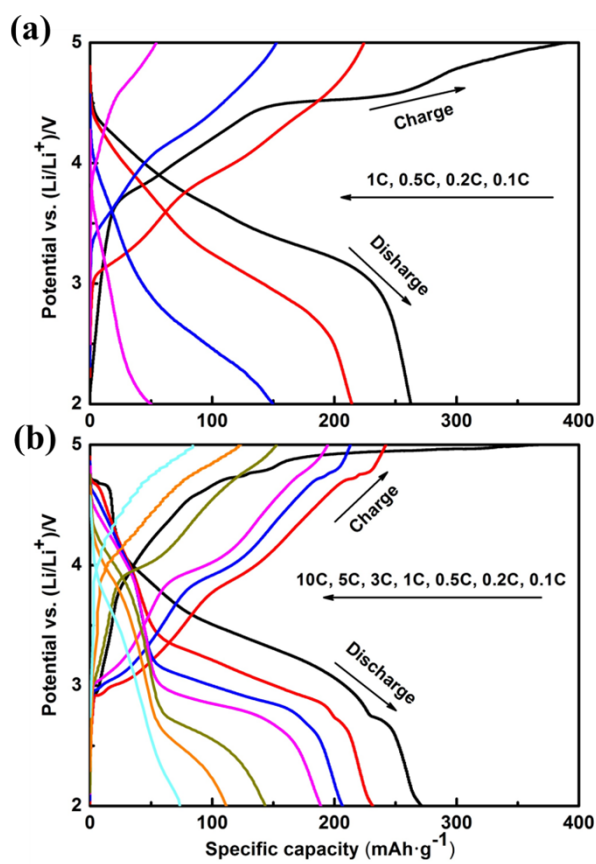

Fig. S2 Charge and discharge curves of (a) PL and (b) SL samples at various rates between 2.0 and 5.0 V

Table S1 Capacity contribution of first cycle in different voltage range of PL and SL samples

| Samples | Charge capacity<br>(mAh g <sup>-1</sup> ) |         | Discharge capacity<br>(mAh g <sup>-1</sup> ) |         |
|---------|-------------------------------------------|---------|----------------------------------------------|---------|
|         | < 4.4 V                                   | > 4.4 V | < 3.5 V                                      | > 3.5 V |
| PL      | 124                                       | 219     | 125                                          | 137     |
| SL      | 107                                       | 240     | 162                                          | 131     |
